# Supplementary material for: Room temperature aqueous synthesis of UiO-66 derivatives via postsynthetic exchange
Source: Royal Society of Chemistry journal article supplement (doi:10.1039/d0dt01939a), 2020-01-01
Supplement: d0dt01939a1.pdf [file d0dt01939a1.pdf]

# **Room Temperature Aqueous Synthesis of UiO-66 Derivatives via Postsynthetic Exchange**

Mark Kalaj, Kathleen E. Prosser, and Seth M. Cohen\*

*Department of Chemistry and Biochemistry, University of California, San Diego, La  
Jolla, California 92093, United States*

## **SUPPORTING INFORMATION**

## **Materials Synthesis**

All solvents and starting materials were purchased from chemical suppliers and used without further purification (Sigma Aldrich, Alfa Aesar, EMD, and TCI).

## **MOF Syntheses**

**UiO-66-F<sub>4</sub>.** This MOF was synthesized using a previously reported method (*CrystEngComm* **2019**, *21*, 2409-2415). In a 100 mL Erlenmeyer flask, zirconium (IV) oxynitrate hydrate ( $\text{ZrO}(\text{NO}_3)_2 \cdot x\text{H}_2\text{O}$ ) (1.62 g, 7.02 mmol) was dissolved in 36 mL of DI H<sub>2</sub>O via sonication. In a separate 100 mL Erlenmeyer flask, tetrafluoroterephthalic acid (1.08 g, 4.54 mmol) was dissolved in 36 mL of DI H<sub>2</sub>O via sonication. The two solutions were mixed together and stirred for 40 h at room temperature. The crystalline powder was collected by centrifugation (8500 rpm for 10 min). The crystalline powder was washed 3×40 mL of DI H<sub>2</sub>O and subsequently with 2×40 mL of ethanol and immersed in acetone for 2 d. Fresh acetone was exchanged every 24 h. The powder was isolated and dried in a vacuum oven at room temperature overnight.

**UiO-66 PSE Synthesis.** Terephthalic acid (1.65 g, 9.93 mmol) was dissolved in 50 mL of 4% KOH solution (0.2 mM). The solution was then neutralized to pH = 7 using 1M HCl. 4 mL (0.8 mmol) of terephthalic acid solution was added to 256 mg (0.8 mmol ligand) of UiO-66-F<sub>4</sub>. The mixture was sonicated for 5 min and allowed to sit at room temperature for 2 h. The crystalline powder was collected by centrifugation (8000 rpm for 10 min). The solids were then washed 3×20 mL of H<sub>2</sub>O and 3×20 mL of methanol. After washing the solids were immersed in methanol for 3 d, with fresh methanol being exchanged every

24 h.

**UiO-66-NH<sub>2</sub> PSE Synthesis.** 2-Aminoterephthalic acid (1.80 g, 9.93 mmol) was dissolved in 50 mL of 4% KOH solution (0.2 mM). The solution was then neutralized to pH = 7 using 1M HCl. 4 mL (0.8 mmol) of 2-aminoterephthalic acid solution was added to 256 mg (0.8 mmol ligand) of UiO-66-F<sub>4</sub>. The mixture was sonicated for 5 min and allowed to sit at room temperature for 2 h. The crystalline powder was collected by centrifugation (8000 rpm for 10 min). The solids were then washed 3×20 mL of H<sub>2</sub>O and 3×20 mL of methanol. After washing the solids were immersed in methanol for 3 d, with fresh methanol being exchanged every 24 h.

**UiO-66-Br PSE Synthesis.** 2-Bromoterephthalic acid (2.43 g, 9.93 mmol) was dissolved in 50mL of 4% KOH solution (0.2 mmol). The solution was then neutralized to pH = 7 using 1M HCl. 4 mL (0.8 mmol) of 2-bromoterephthalic acid solution was added to 256 mg (0.8 mmol ligand) of UiO-66-F<sub>4</sub>. The mixture was sonicated for 5 min and allowed to sit at room temperature for 2 h. The crystalline powder was collected by centrifugation (8000 rpm for 10 min). The solids were then washed 3×20 mL of H<sub>2</sub>O and 3×20 mL of methanol. After washing the solids were immersed in methanol for 3 d, with fresh methanol being exchanged every 24 h.

**UiO-66-I PSE Synthesis.** 2-Iodoterephthalic acid (2.90 g, 9.93 mmol) was dissolved in 50mL of 4% KOH solution (0.2 mM). The solution was then neutralized to pH = 7 using 1M HCl. 4 mL (0.8 mmol) of 2-iodoterephthalic acid solution was added to 256 mg (0.8

mmol ligand) of UiO-66-F<sub>4</sub>. The mixture was sonicated for 5 min and allowed to sit at room temperature for 2 h. The crystalline powder was collected by centrifugation (8000 rpm for 10 min). The solids were then washed 3×20 mL of H<sub>2</sub>O and 3×20 mL of methanol. After washing the solids were immersed in methanol for 3 d, with fresh methanol being exchanged every 24 h.

**UiO-66-Naphth PSE Synthesis.** Naphthalene terephthalic acid (2.15 g, 9.93 mmol) was dissolved in 50mL of 4% KOH solution (0.2 mM). The solution was then neutralized to pH = 7 using 1M HCl. 4 mL (0.8 mmol) of naphthalene terephthalic acid solution was added to 256 mg (0.8 mmol ligand) of UiO-66-F<sub>4</sub>. The mixture was sonicated for 5 min and allowed to sit at room temperature for 2 h. The crystalline powder was collected by centrifugation (8000 rpm for 10 min). The solids were then washed 3×20 mL of H<sub>2</sub>O and 3×20 mL of methanol. After washing the solids were immersed in methanol for 3 d, with fresh methanol being exchanged every 24 h.

**Table S1.** Ligand percentages of MOFs synthesized through postsynthetic exchange (PSE) of UiO-66-F<sub>4</sub>.

| MOF                         | % F <sub>4</sub> -bdc <sup>2-</sup> linker after PSE | % R-bdc <sup>2-</sup> linker after PSE |
|-----------------------------|------------------------------------------------------|----------------------------------------|
| UiO-66-F <sub>4</sub>       | 100%                                                 | 0%                                     |
| UiO-66-PSE                  | 7 ± 2%                                               | 93 ± 2%                                |
| UiO-66-NH <sub>2</sub> -PSE | 4 ± 2%                                               | 96 ± 2%                                |
| UiO-66-Br-PSE               | 10 ± 2%                                              | 90 ± 2%                                |
| UiO-66-I-PSE                | 19 ± 2%                                              | 81 ± 2%                                |
| UiO-66-Naphth-PSE           | 24 ± 2%                                              | 76 ± 2%                                |

## **Characterization Methods**

**Powder X-ray Diffraction (PXRD).** PXRD data was collected at room temperature on a Bruker D8 Advance diffractometer running at 40 kV, 40 mA for Cu K $\alpha$  ( $\lambda = 1.5418 \text{ \AA}$ ), with a scan speed of 0.5 sec/step, a step size of  $0.01^\circ$  in  $2\theta$ , and a  $2\theta$  range of  $3\text{-}50^\circ$  at room temperature.

**Scanning Electron Microscopy (SEM).** MOFs were placed on conductive carbon tape on an aluminum sample holder and coated using an iridium-sputter coating for 8 s. A FEI Quanta FEG 250 microscope was used for acquiring images using a 5 kV energy source with a spot size of 3 under high vacuum at a working distance of 10 mm.

### **Nuclear Magnetic Resonance.**

NMR experiments were carried out on a JOEL ECA 500 MHz spectrometer equipped with a Jeol 2 channel inverse-detect  $^1\text{H}/^{19}\text{F}$  probe. MOFs were digested for NMR analysis by immersion of  $\sim 5\text{-}10$  mg MOF in 500  $\mu\text{L}$  DMSO- $d_6$  with 5  $\mu\text{L}$  HF (48% in water). Samples were kept in this acidic solution at room temperature until the MOF was fully dissolved. In each NMR experiment was included a coaxial tube containing a reference sample of 40  $\mu\text{mol}$  of trifluorotoluene in 100  $\mu\text{L}$  deuterated DMSO. The parameters used for each NMR nuclei are included in Table S2.

**Table S2.** NMR parameters used to analyze digested MOF samples.

| <b>Parameter</b>         | <b><sup>1</sup>H experiment</b> | <b><sup>19</sup>F experiment</b> |
|--------------------------|---------------------------------|----------------------------------|
| <b>Gain</b>              | 36                              | 50                               |
| <b>Sweep Center</b>      | 5 ppm                           | -100 ppm                         |
| <b>Sweep Width</b>       | 15 ppm                          | 150 ppm                          |
| <b>X-pts</b>             | 32768                           | 262144                           |
| <b>Scan Number</b>       | 128                             | 128                              |
| <b>Acquisition time</b>  | 4.367 s                         | 3.713 s                          |
| <b>Acquisition delay</b> | 5 s                             | 5 s                              |

**N<sub>2</sub> Gas Sorption Analysis:** Samples for analysis were evacuated in a vacuum oven overnight at room temperature prior to analysis. ~50 mg of sample was then transferred to pre-weighed sample tubes and degassed at 105 °C on a Micromeritics ASAP 2020 Adsorption Analyzer for a minimum of 12 h or until the outgas rate was <5 mmHg. After degassing, the sample tubes were re-weighed to obtain a consistent mass for the samples. Sorption data and BET surface area (m<sup>2</sup>/g) measurements were collected at 77 K with N<sub>2</sub> on a Micromeritics ASAP 2020 Adsorption Analyzer using volumetric technique.

**Catalysis Experiments.** In this study, DMNP hydrolysis was measured using a modified version of a previously reported procedure (*Chem. Commun.* **2018**, 54, 5768-5771). All catalytic monitoring was carried out using a BioTek Synergy H4 plate reader using single wavelength absorbance mode. 20 and 40 mM of *N*-ethylmorpholine buffer was prepared from deionized water adjusted to pH = 8.0. A plot of absorbance of *p*-nitrophenol at varying concentrations was measured yielding a calibration curve with a slope of 3.48

Abs/mM (*Chem. Commun.* **2018**, *54*, 5768-5771). MOF samples were prepared by weighing 6 mg of MOF powder and diluting this powder in 10 mL of deionized water. These solutions were rigorously sonicated and vortexed (>3× of each) and diluted in half with 40 mM buffer solution yielding 300 µg/mL MOF in 20 mM buffer solution. Dimethyl *p*-nitrophenylphosphate (DMNP) hydrolysis assays with MOF powders were carried out in Olympus Plastics clear, flat-bottom 96-well plates. Each well was prepared with 100 µL total volume containing: 95 µL MOF suspension in buffer and 5 µL substrate (25 mM DMNP in MeOH; 1.25 mM total concentration; 0.125 µmol). Upon the addition of substrate using a multi-channel pipette, hydrolysis was monitored by the change in absorbance ( $\lambda_{\text{max}} = 407 \text{ nm}$ ) over 15 min at 24 °C with 3 sec shaking of the plate every 10 sec. The absorbance was monitored from the 30 to 360 sec time period, as previously reported in (*Chem. Commun.* **2019**, *55*, 53481-3484).

**Table S3.** Corrected hydrolysis calculation to account for increased mass of MOFs used in this study MOF materials.

| <b>MOF</b>                            | <b>Molar Mass<br/>of MOF<br/>(g/mol)</b> | <b>Mole ratio to<br/>UiO-66<br/>Standard</b> | <b>Experimental<br/>Hydrolysis<br/>Rate<sup>a</sup> (<i>k</i>,<br/>mM/sec)</b> | <b>Molar Mass<br/>Corrected<br/>Hydrolysis<br/>Rate (<i>k</i>,<br/>mM/sec)</b> |
|---------------------------------------|------------------------------------------|----------------------------------------------|--------------------------------------------------------------------------------|--------------------------------------------------------------------------------|
| <b>UiO-66-F<sub>4</sub></b>           | 2070                                     | 0.80                                         | 24.2                                                                           | 30.3                                                                           |
| <b>UiO-66-PSE</b>                     | 1662                                     | 1.00                                         | 50.6                                                                           | 50.6                                                                           |
| <b>UiO-66-NH<sub>2</sub>-<br/>PSE</b> | 1752                                     | 0.94                                         | 76.9                                                                           | 81.8                                                                           |

<sup>a</sup> 6 mg of MOF used in each experiment.



## NMR Spectroscopy

a)  $^1\text{H}$  NMR

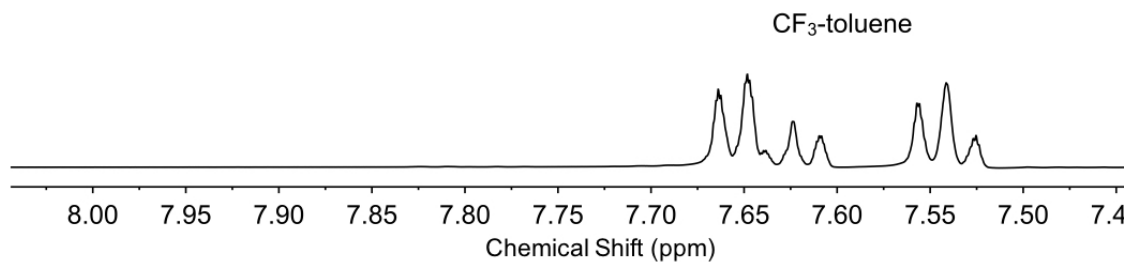

b)  $^{19}\text{F}$  NMR

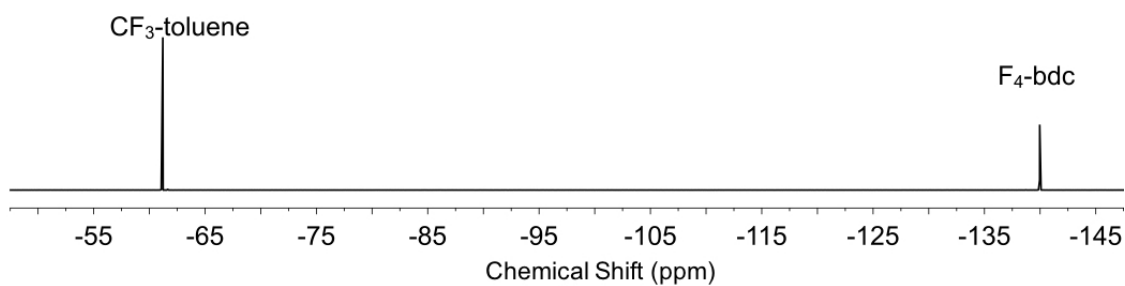

**Figure S1.** a)  $^1\text{H}$  NMR spectra of digested UiO-66-F<sub>4</sub>. b)  $^{19}\text{F}$  NMR spectra of digested UiO-66-F<sub>4</sub>.

a)  $^1\text{H}$  NMR

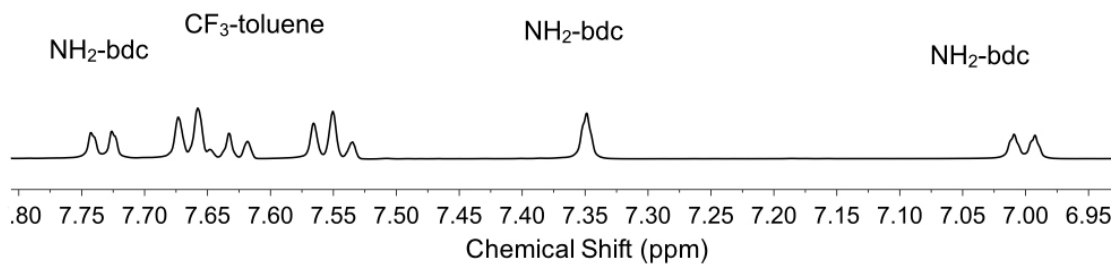

b)  $^{19}\text{F}$  NMR

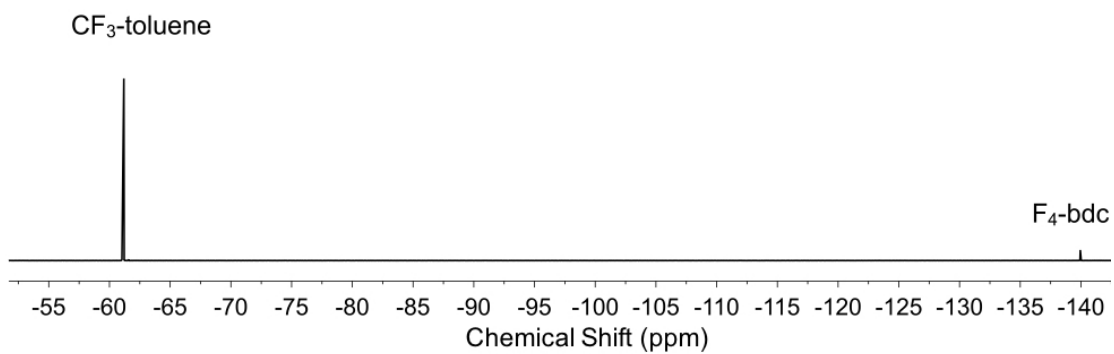

**Figure S2.** a)  $^1\text{H}$  NMR spectra of digested UiO-66- $\text{NH}_2$ -PSE. b)  $^{19}\text{F}$  NMR spectra of digested UiO-66- $\text{NH}_2$ -PSE.

a)  $^1\text{H}$  NMR

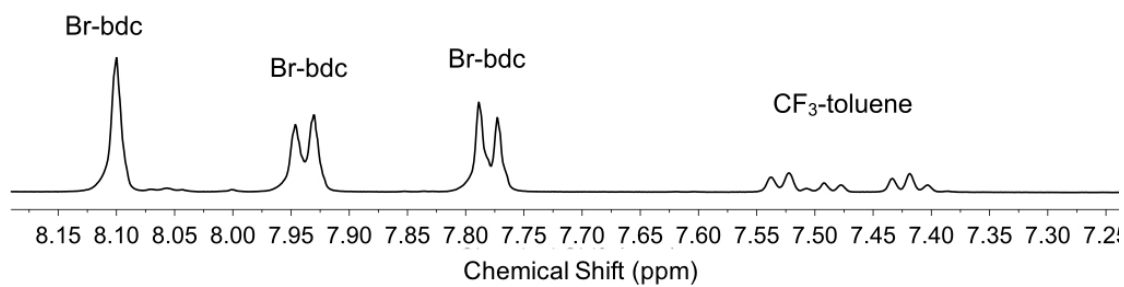

b)  $^{19}\text{F}$  NMR

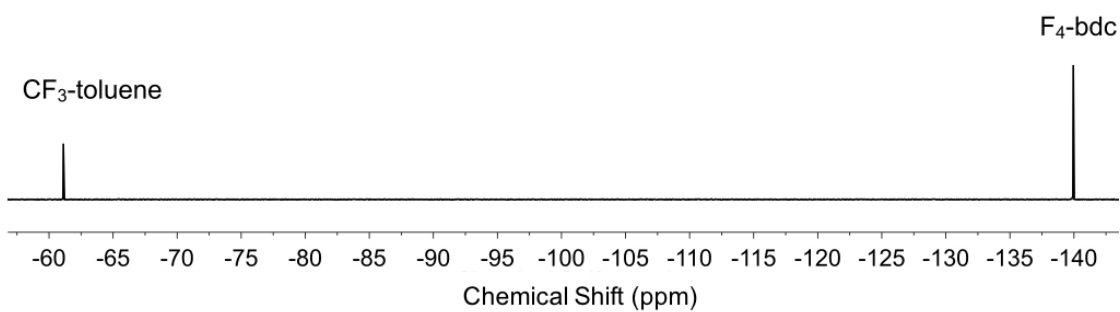

**Figure S3.** a)  $^1\text{H}$  NMR spectra of digested UiO-66-Br-PSE. b)  $^{19}\text{F}$  NMR spectra of digested UiO-66-Br-PSE.

a)  $^1\text{H}$  NMR

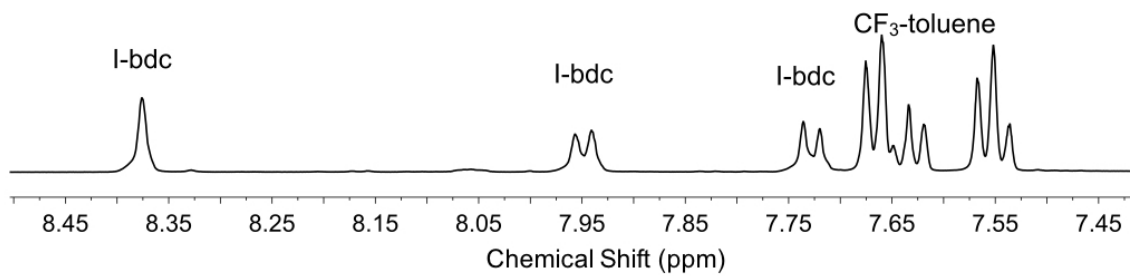

b)  $^{19}\text{F}$  NMR

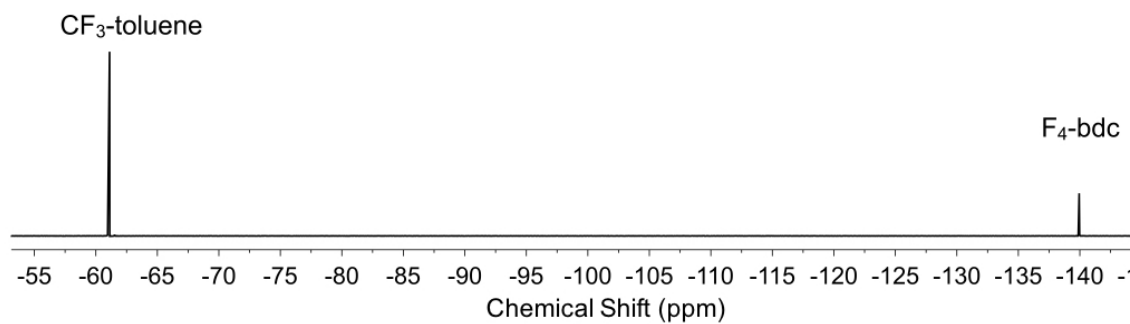

**Figure S4.** a)  $^1\text{H}$  NMR spectra of digested UiO-66-I-PSE. b)  $^{19}\text{F}$  NMR spectra of digested UiO-66-I-PSE.

a)  $^1\text{H}$  NMR

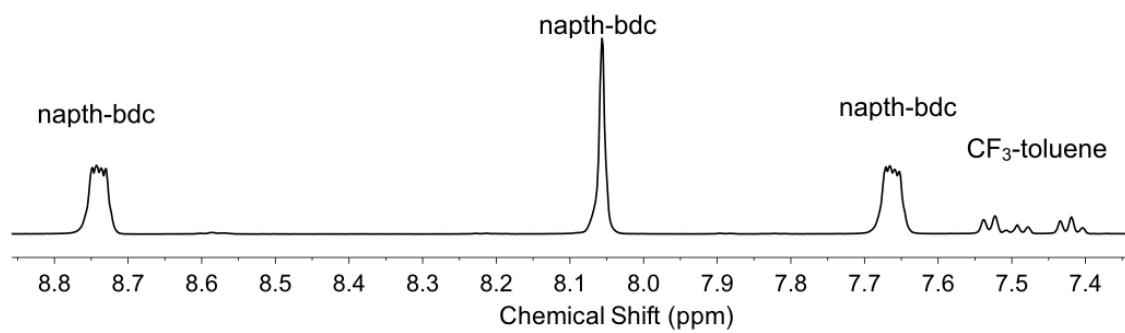

b)  $^{19}\text{F}$  NMR

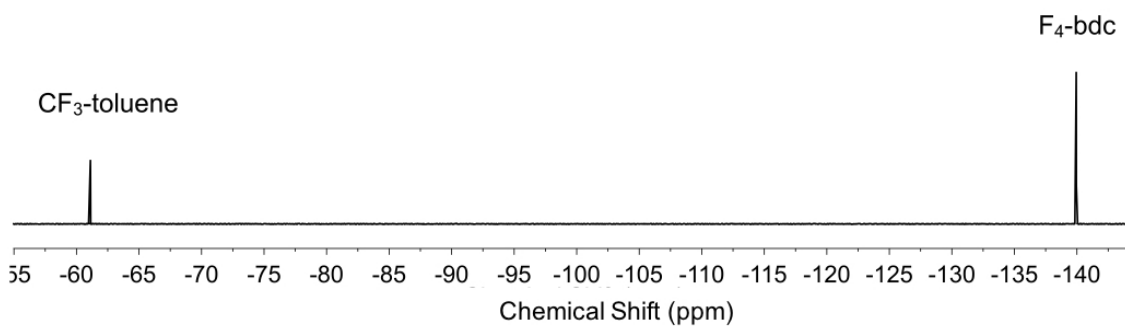

**Figure S5.** a)  $^1\text{H}$  NMR spectra of digested UiO-66-Naph-PSE. b)  $^{19}\text{F}$  NMR spectra of digested UiO-66-Naph-PSE.

**Scanning Electron Microscopy (SEM)**

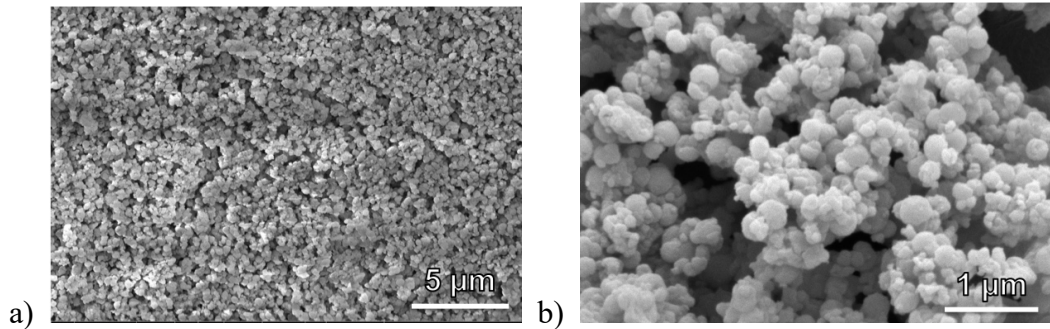

**Figure S6.** SEM images of UiO-66-F<sub>4</sub>.

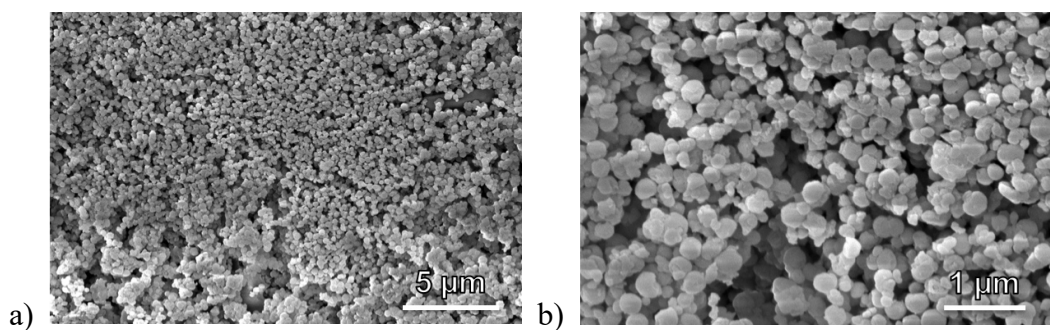

**Figure S7.** SEM images of UiO-66-PSE.

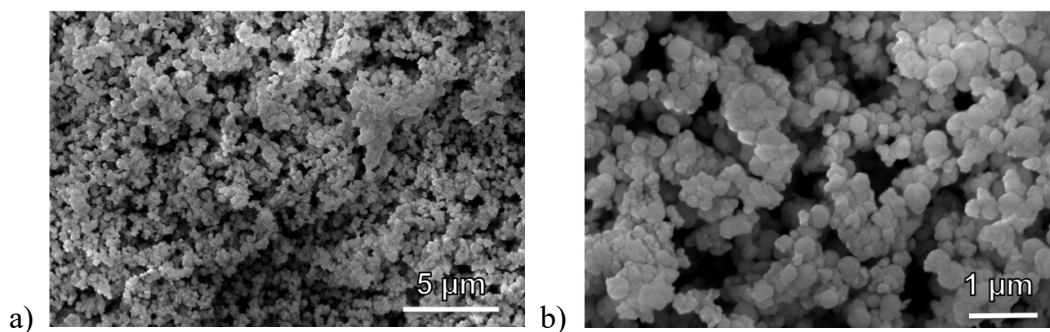

**Figure S8.** SEM images of UiO-66-NH<sub>2</sub>.

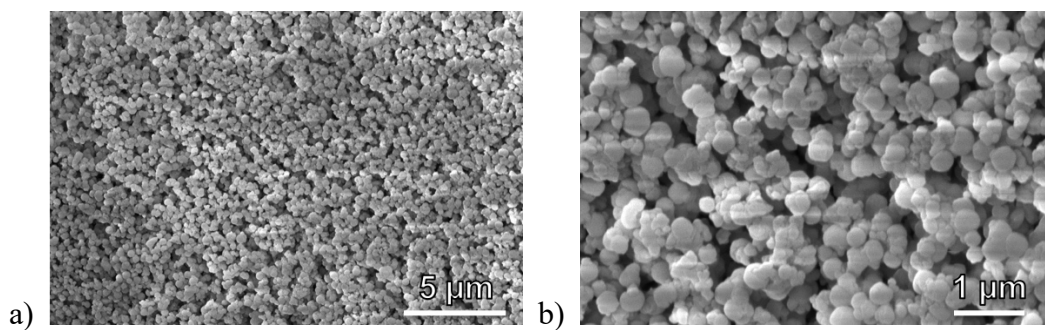

**Figure S9.** SEM images of UiO-66-Br-PSE.

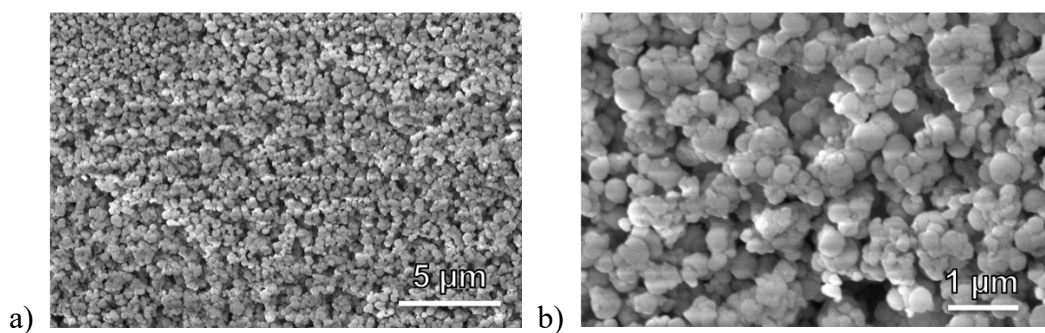

**Figure S10.** SEM images of UiO-66-I-PSE.

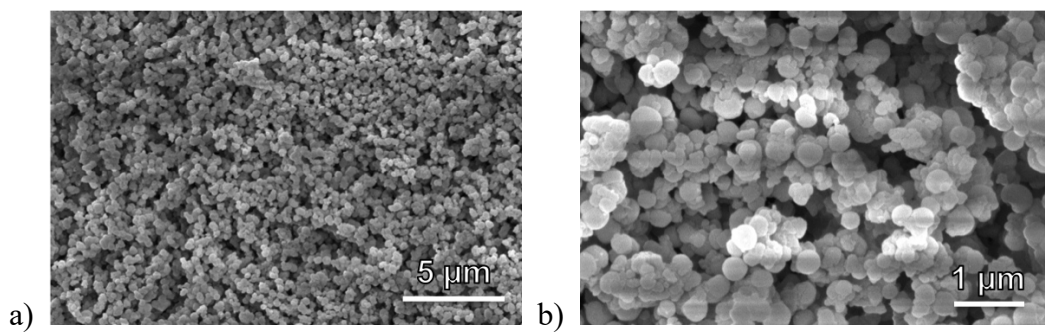

**Figure S11.** SEM images of UiO-66-Naph-PSE.

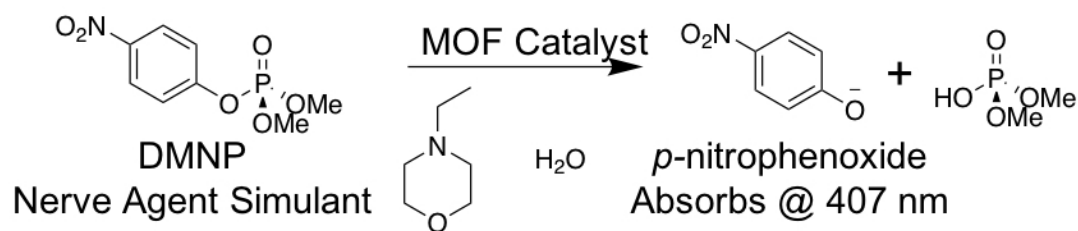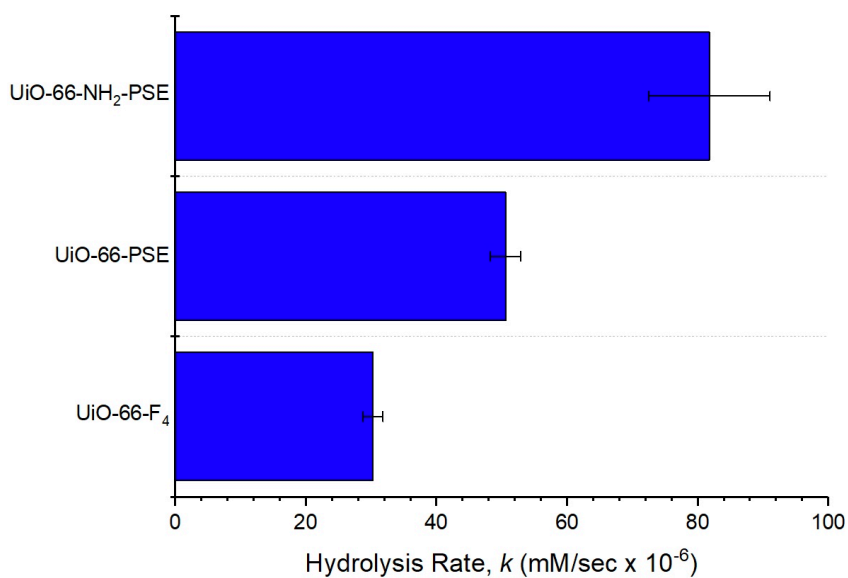

**Figure S12.** *Top:* DMNP degradation reaction. *Bottom:* Rate of catalytic degradation of DMNP by MOFs measured by UV-visible adsorption (407 nm) at pH = 8 (corrected for differences in the molar mass of each MOF).
